# Supplementary material for: Removal of developmentally regulated microexons has a minimal impact on larval zebrafish brain morphology and function
Source: eLife. 2025 Nov 18;13:RP101790. doi: 10.7554/eLife.101790 (PMC12626420; doi:10.7554/eLife.101790)
Supplement: Figure 1—figure supplement 2—source data 1. [file elife-101790-fig1-figsupp2-data1.xlsx]

## Sheet: Sheet1
eif4g3b
wt	het	hom
1.28423	1.48202	1.57742
0.715771	1.10515	0.790536
	0.835611
meaf6
wt	het	hom
0.958218	0.934172	0.912835
1.07308	0.934172	0.741452
0.912835	1.04374	0.942845
1.05587	1.03414
nrxn1a
wt	het	hom
1.25717	1.69763	1.14885
1.13565	1.55493	0.988641
0.607175	1.90993	1.15684
	1.78203
ppp6r3
wt	het	hom
0.972261	0.97451	0.827071
0.768126	0.99269	0.878278
1.26232	0.880309	0.928355
0.997288	0.787899
sptan1
wt	het	hom
0.83426	0.733009	1.51421
1.19629	1.16089	0.842006
0.969448	1.05353	1.08065
	0.840063
tenm3
wt	het	hom
0.780442	0.630993	1.11396
0.773262	0.800531	1.16126
1.4463	0.863956	1.20778
	0.852062	0.710725
vav2
wt	het	hom
1.11601	0.960385	0.743129
0.813201	1.05581	0.540244
1.05094	1.08299	0.646931
1.01985
vti1a
wt	het	hom
1.01468	0.989212	1.42835
0.986929	0.957726	0.920837
0.998396	0.935851	1.27546
	1.07501
